# Supplementary material for: Beeswax Alcohol (BWA) Protects Lipoproteins From Oxidation to Rescue Embryo Death From Acute Toxicity and to Exert Antioxidant Activities in Serum of Subjects With Sixties Individuals After 12 Weeks Consumption of BWA 100 mg/Day
Source: Preprints.org preprint supplement (doi:10.20944/preprints202311.0456.v1), 2023-11-08
Supplement: Supplementary file 1 [file supplementary]

**Supplementray material**

**
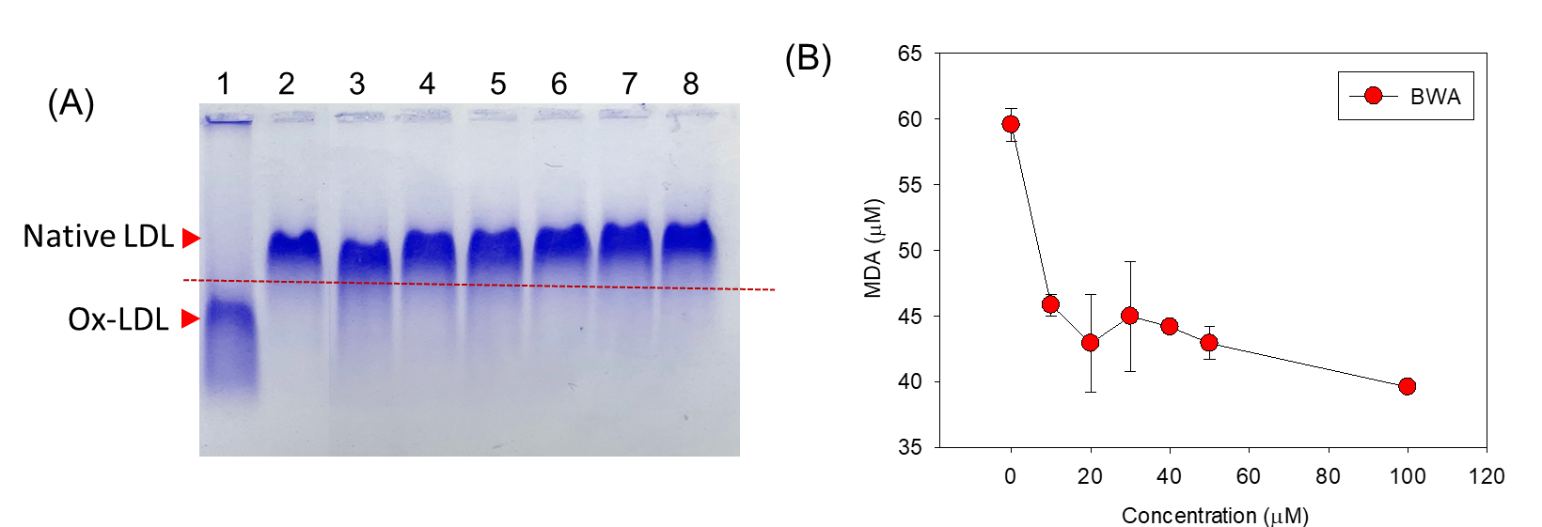
**

**Supplementary Figure S1.** Effect of beeswax alcohol (BWA) on CuSO4 induced oxidation of LDL. **(A)** Electrophoretic mobility of apo-B fraction of LDL. Lanes 1 represent LDL+CuSO4 (OxLDL), Lane 2 represent Native LDL, Lane 3, 4, 4, 5, 7, 8 represent LDL+CuSO4 treated with 10, 20, 30, 40, 50 and 100 μM BWA. Electrophoresis was performed on 0.5% agarose gel using Tris-EDTA buffer (pH 8.0) at a constant voltage (50 V).The red dotted line indicates different electromobility from the loading position depends on the extent of oxidation. **(B)** Quantification of CuSO4-induced LDL oxidation in the presence and absence of BWA. The LDL oxidation was quantified by thiobarbituric acid reactive substance (TBARS) assay using malondialdehyde (MDA) as reference.
